# Supplementary material for: El Niño drives a widespread ulcerative skin disease outbreak in Galapagos marine fishes
Source: PubMed Central journal article supplement (PMC6226461; doi:10.1038/s41598-018-34929-z), 2018-11-09
Supplement: 41598_2018_34929_MOESM1_ESM.pdf [file 41598_2018_34929_MOESM1_ESM.pdf]

# **El Niño drives a widespread ulcerative skin disease outbreak in Galapagos marine fishes**

Robert W. Lamb\*, Franz Smith, Anaide W. Aued, Pelayo Salinas de León, Jenifer Suarez, Marta Gomez-Chiari, Roxanna Smolowitz, Cem Giray, and Jon D. Witman

## **Supplementary Information**

\*Corresponding author email: [robert\\_lamb@brown.edu](mailto:robert_lamb@brown.edu)

---

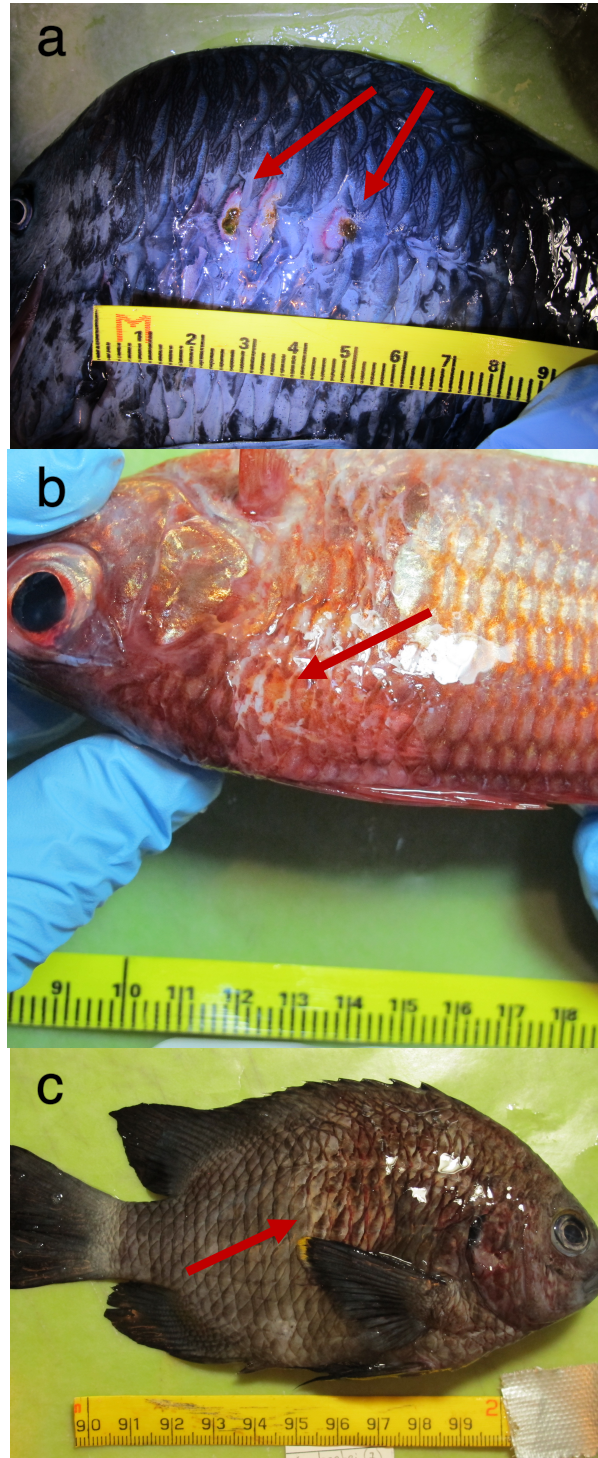

**Supplementary Figure S1 | Macroscopic manifestations of ulcerative skin disease. (a)** Ulcers below the dorsal fin of a *Microspathodon dorsalis* taken from Camaño. **(b)** Scale loss on the dorsal side of a *Myripristis leiognathus* taken from Cuatro Hermanos (East). **(c)** Extensive scale

loss and hemorrhage along the entire anterior portion of a *Stegastes beebei* taken from Cuatro Hermanos (East).

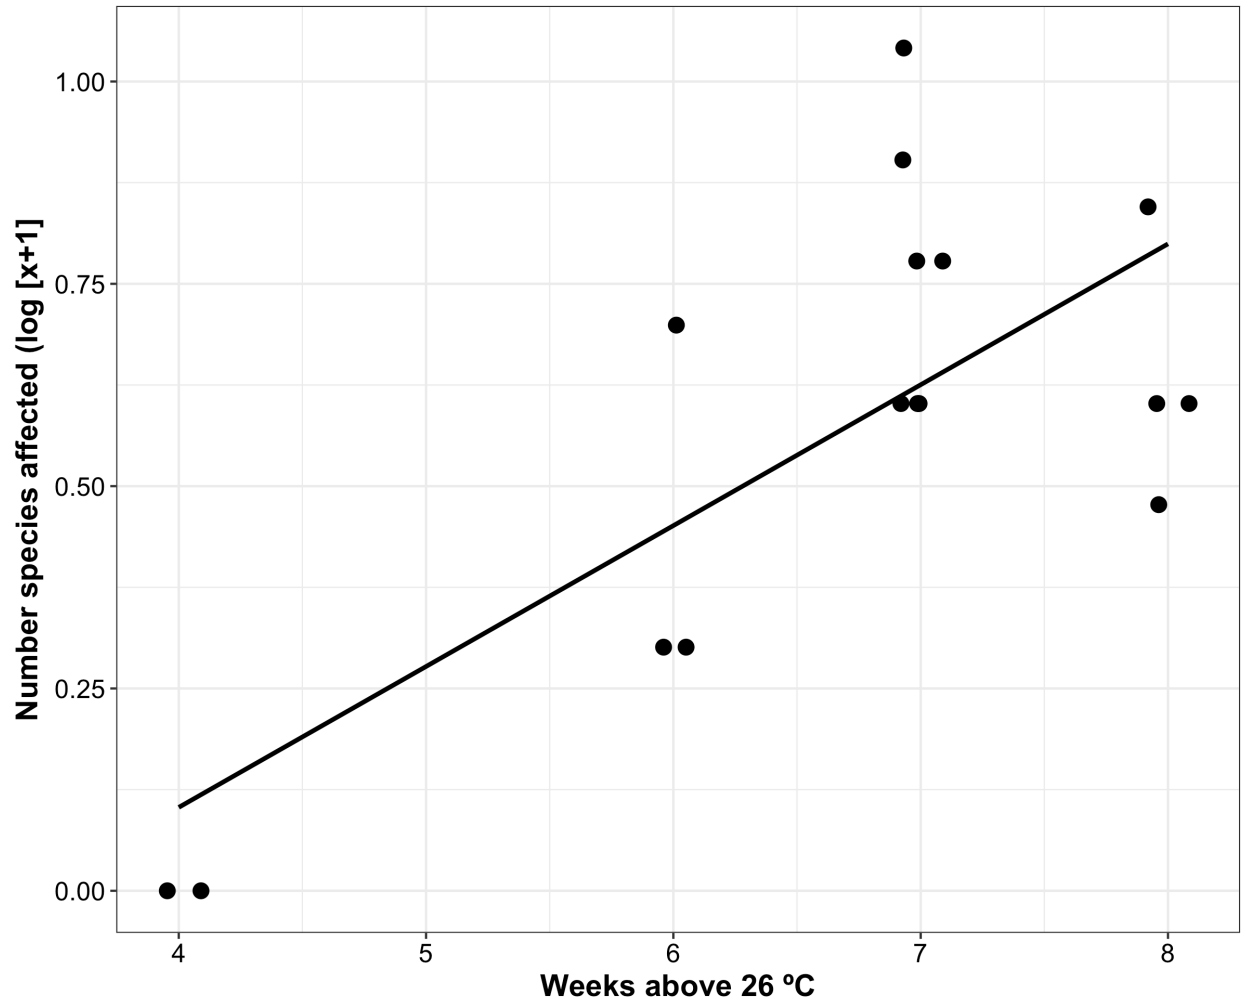

**Supplementary Figure S2 | Relationship between temperature and number of species**

**affected by ulcerative skin disease across sites.** Points are survey sites ( $n = 16$ ). The X-axis represents the number of weeks between Sept. 1, 2015 and Jan 31, 2016, during which mean sea surface temperature surpassed 26 °C. The y-axis represents the number of species observed with ulcerative skin disease (log[x+1]-transformed to meet linear regression model assumptions). A very slight jitter was added to point locations on the x-axis to visualize overlapping points, but the regression line represents true values. There was a significant positive linear relationship between the two variables ( $y = 0.174x - 0.593$ ,  $P = 0.0012$ ,  $R^2 = 0.505$ ).

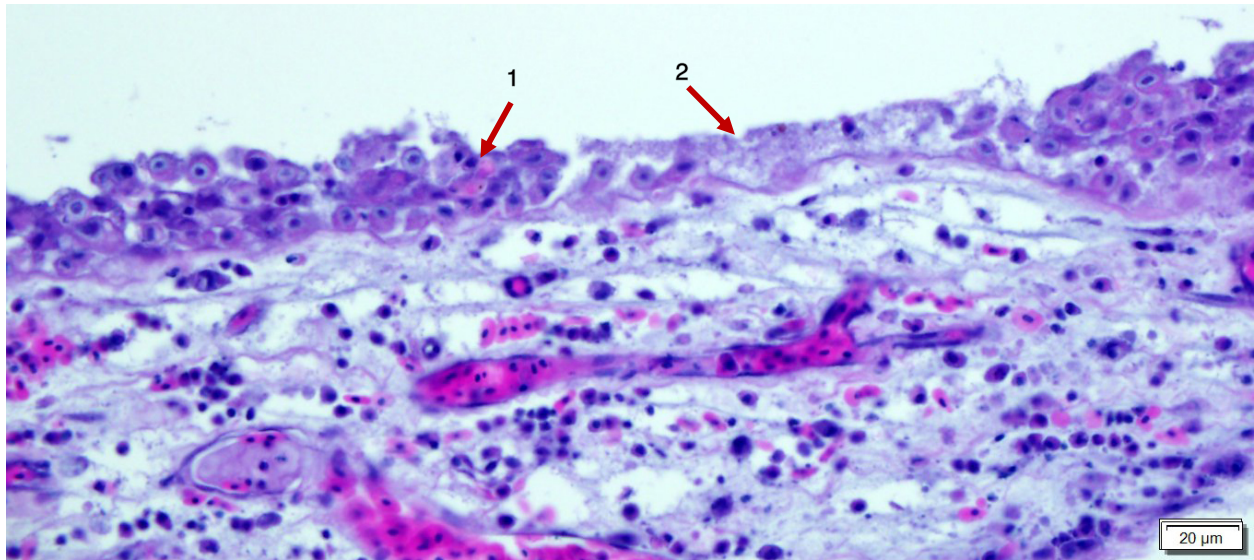

**Supplementary Figure 3 | Microscopic histology slide of ulcerative skin disease.** Lesions characterized by diffuse moderate macrophagic and lymphocytic dermatitis with vascular congestion, mild dermal hemorrhage and severe diffuse edema. Arrows indicate vacuolation of epithelial nuclei and rare cytoplasmic eosinophilic inclusions (**1**) and edema of epidermal cells with ulceration associated with debris and possible bacteria (**2**) (6  $\mu\text{m}$  sections of paraffin embedded tissues stained with hematoxylin and eosin).

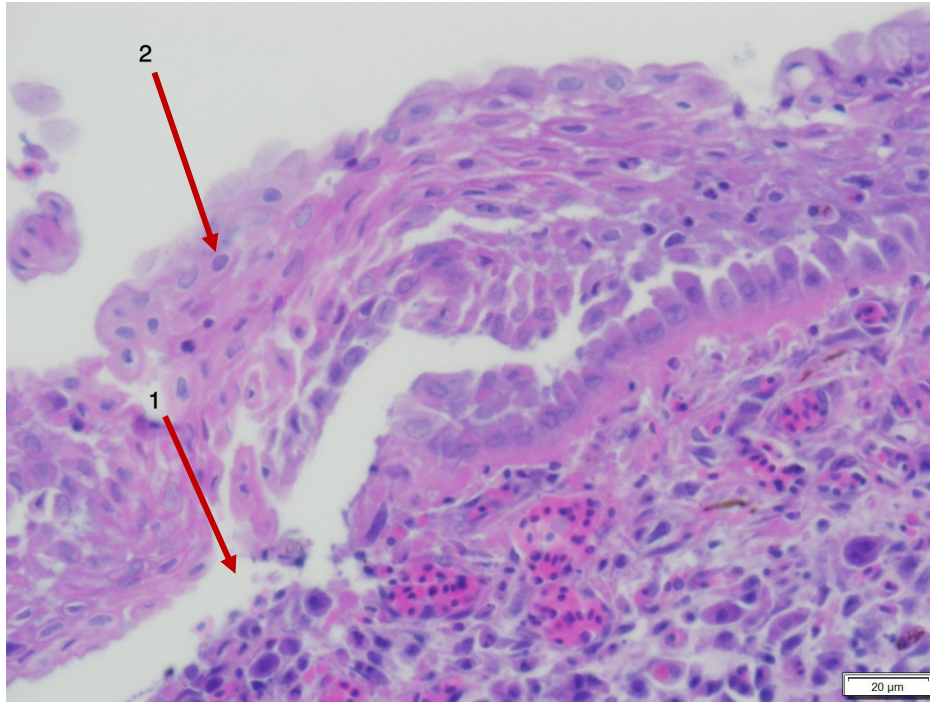

**Supplementary Figure 4 | Microscopic histology slide of epithelial degloving.** All layers of the squamous stratified epithelium are dead or edematous resulting in separation of most of the layers of the epithelium (degloving) from the underlying basal epithelial cells resulting in erosion (**1**) and ulceration. Severe macrophagic and lymphocytic infiltration with vascular congestions and mild hemorrhage is noted in the underlying dermis. Amphiphilic to eosinophilic inclusions are rarely noted in the nuclei (**2**) (6  $\mu\text{m}$  sections of paraffin-embedded tissues stained with hematoxylin and eosin).

**Supplementary Table S1: Extended literature review of reports of ulcerative skin disease in fish populations.** We tabulated reports of ulcerative skin disease in wild populations as well as

selected cases of similar symptoms to those in our study reported from aquaculture. Here we

summarized the species affected, associated pathogens, disease signs, and environmental triggers.

| Author            | Date | Publication                                    | Citation                                                                                                                  | Primary species                                                                                                       | Number species affected                                       | Pathogen                                                                                 | Disease signs                                                                                                                                                                                                                                                                                                          | Environmental context                                                                                                                                                                                   | Notes                                                                                                                                                                                                                                                                                                                                                                                                                      |
|-------------------|------|------------------------------------------------|---------------------------------------------------------------------------------------------------------------------------|-----------------------------------------------------------------------------------------------------------------------|---------------------------------------------------------------|------------------------------------------------------------------------------------------|------------------------------------------------------------------------------------------------------------------------------------------------------------------------------------------------------------------------------------------------------------------------------------------------------------------------|---------------------------------------------------------------------------------------------------------------------------------------------------------------------------------------------------------|----------------------------------------------------------------------------------------------------------------------------------------------------------------------------------------------------------------------------------------------------------------------------------------------------------------------------------------------------------------------------------------------------------------------------|
| Noga et al        | 1996 | Marine Pollution Bulletin                      | Vol 32, No.2, pp. 219-224                                                                                                 | Striped bass <i>Morone saxatilis</i>                                                                                  | 2                                                             | Dinamoebales (dinoflagellate)                                                            | Diffuse erythema, dull luster of skin, loss of epithelium extending to basement membrane, myonecrosis, ulcers with gram-negative bacterial infection ( <i>Aeromonas</i> ), intra and extra-cellular edema, necrosis. Patches of dull skin lead to scale loss and ulcers, erythematous dermatitis; may involve the eye. | Dinoflagellate blooms; estuarine eutrophication                                                                                                                                                         | Noga et al 1996 performed laboratory trials with a novel dinoflagellate (new family, order Dinamoebales) that was causing fish kills in Atlantic estuaries. Yielded 100% mortality within 24-48 hrs in striped bass and tilapia. Histology of non-skin tissues was normal. Believed triggers are coastal eutrophication and immunosuppression. Ulcers occur rapidly and are colonized by multiple environmental pathogens. |
| McKenzie and Hall | 1976 | Australian Veterinary Journal                  | Vol 250, No. 5, pp. 230-231                                                                                               | Mullet ( <i>Mugil cephalus</i> )                                                                                      | 1                                                             | Aphanomyces                                                                              | Extravasation of leucocytes forming perivascular cuffs                                                                                                                                                                                                                                                                 | Drops in temperature, salinity, DO, pH<br>Ulcerative mycosis is common in estuarine and aquaculture fishes and is believed to be triggered by low salinity and high nutrient loads from coastal runoff. | Bundaberg disease or Red Spot Disease (RSD) was first observed in mullet ( <i>Mugil</i> spp.) in Australia                                                                                                                                                                                                                                                                                                                 |
| Noga              | 1993 | Pathobiology of marine and estuarine organisms | Fungal diseases of marine and estuarine fishes, pp. 85-100<br>Fish disease outbreak in Burma; report number TCP/BU R/4402 | Atlantic menhaden ( <i>Brevoortia tyrannus</i> ), Barramundi ( <i>Lates calcarifer</i> ), goldfish, catfish, bluegill | >30 reported, but different outbreaks and suspected pathogens | Several fungal pathogens: <i>Aphanomyces</i> , <i>Achlya</i> , <i>Saprolegnia</i> common | Surface lesions progress to deep ulcers penetrating superepidermal muscle. Large necrotic pits result, with masses of hyphae, bacteria, and necrotized muscle that can slough off, leaving a cavity in the skin.                                                                                                       |                                                                                                                                                                                                         | Noga 1993 reviews fungal diseases affecting marine fish populations. Points out ulcerative mycosis is generally associated with large outbreaks in Atlantic menhaden off the US Atlantic coast, may be picked up from sediments when they dive down to feed. Occurrences from New England to Florida                                                                                                                       |
| Boonyaratpalin    | 1985 | FAO special report                             |                                                                                                                           | <i>Ophicephalus</i> spp.                                                                                              | 1                                                             | Aphanomyces                                                                              | Surface lesions and ulcerated skin                                                                                                                                                                                                                                                                                     | Cooling temperatures                                                                                                                                                                                    | First mention of Epizootic Ulcerative Syndrome; later synonymized with Red Spot Disease (Callinan et al 1995)<br>Pathological study found the same fungal pathogen <i>Aphanomyces</i> responsible for both Red Spot Disease (RSD)/Bundaberg disease and Epizootic Ulcerative Syndrome (EUS) across Australia and Philippines                                                                                               |
| Callinan et al    | 1995 | Diseases of aquatic organisms                  | Vol 21, pp 233-238                                                                                                        | Several species of <i>Mugil</i> , <i>Arius</i> , and <i>Scatophagus</i>                                               | >15                                                           | Aphanomyces                                                                              | Surface lesions, hyphal infiltration                                                                                                                                                                                                                                                                                   | NA                                                                                                                                                                                                      | Winter ulcer appears on farmed Atlantic salmon in cold temperatures, observed in Iceland,                                                                                                                                                                                                                                                                                                                                  |
| Lunder et al      | 1995 | Diseases of aquatic organisms                  | Vol 23, pp 39-49.                                                                                                         | Salmo salar (Atlantic salmon)                                                                                         | 1                                                             | Vibrio bacteria                                                                          | Ulcers over scale-covered skin, internal hemorrhage and                                                                                                                                                                                                                                                                | Crowding in aquaculture, cold temperatures                                                                                                                                                              |                                                                                                                                                                                                                                                                                                                                                                                                                            |

|                    |      |                                                                                                   |                                              |                                                                        |     |                                |  |                                                                                                                                         |          |                                                                                            |                                                                                                                                                                                                                     |
|--------------------|------|---------------------------------------------------------------------------------------------------|----------------------------------------------|------------------------------------------------------------------------|-----|--------------------------------|--|-----------------------------------------------------------------------------------------------------------------------------------------|----------|--------------------------------------------------------------------------------------------|---------------------------------------------------------------------------------------------------------------------------------------------------------------------------------------------------------------------|
|                    |      |                                                                                                   |                                              |                                                                        |     |                                |  |                                                                                                                                         | petechia | ("winter ulcer")                                                                           | Norway, and Scotland                                                                                                                                                                                                |
| Lunder et al       | 2000 | International Journal of Systematic and Evolutionary Microbiology                                 | Vol 50, 427 – 450.                           | Salmo salar (atlantic salmon)                                          | 1   | Vibrio viscosus, V. wodanis    |  | Ulcers over scale-covered skin, internal hemorrhage and petechia                                                                        |          | Crowding in aquaculture, cold temperatures ("winter ulcer")                                | DNA analysis confirmed Vibrio cause of winter ulcer                                                                                                                                                                 |
| Toranzo et al      | 1991 | Fish Pathology                                                                                    | Vol 26, 55 – 60                              | Salmo salar (atlantic salmon)                                          | 1   | Aeromonas salmonicida          |  | Liquefactive necrosis, scale loss, deep ulcers, hemorrhagic septicemia                                                                  |          | Crowding in aquaculture                                                                    | Common disease in farmed atlantic salmon                                                                                                                                                                            |
| Magariños et al    | 1995 | Diseases of aquatic organisms                                                                     | Vol 21, 103 – 108                            | Seabream, sole, turbot, salmonids, seabass, flounder (cultured fishes) | 8   | Tenacibaculum maritimum        |  | Eroded and hemorrhagic mouth, fin rot, ulcerative skin loss, and involvement of internal organs                                         |          | High temperatures (above 15 C), concomittant environmental stress (skin lesions, crowding, | Tested skin entry pathways for T. maritimum                                                                                                                                                                         |
| Lewis and Chinabut | 1999 | Mycobacteriosis and Nocardiosis. In: Woo, P.T.K., Bruno, D.W. (Eds.), Fish Diseases and Disorders | Vol 3, pp 319 - 340                          | Cod, halibut, striped bass, atlantic mackerel (all wild)               | 200 | Mycobacterium marinum          |  | Tubercle granulomas in the spleen, kidney, and liver, scale loss and hemorrhagic lesions penetrating to the musculature in severe cases |          | including aquaculture, aquaria, and wild populations                                       | Affects over 200 known species, 4 noted as wild populations. This is a chronic disease that remains asymptomatic for long periods                                                                                   |
| Love et al         | 1981 | Science                                                                                           | Vol. 214, Issue 4525, pp. 1139-1140          | Chromis punctipinnis                                                   | 3   | Vibrio damsela                 |  | Skin ulcers                                                                                                                             |          | NA                                                                                         | Laboratory tests confirmed causality in the blacksmith ( <i>C. punctipinnis</i> ) and other damselfish. Also observed in sandbar and spiny dogfish sharks (see Grimes et al 1984)                                   |
| Larsen et al       | 1978 | Veterinary Science Communications                                                                 | Vol 2, 207-216.                              | Cod ( <i>Gadus morhua</i> )                                            | 1   | Vibrio anguillarum             |  | Skin ulcers                                                                                                                             |          | Coastal pollution including town effluence, sugar and cellulose plant outflows             | Ulcer disease common in polluted waters, absent from other areas. <i>V. anguillarum</i> readily infected pre-existing ulcers and induced systemic vibriosis but did not cause ulcers to occur de novo               |
| Gibson-Kueh et al  | 2012 | Journal of Fish Diseases                                                                          | Vol 35, 19-27                                | Lates calcarifer (barramundi)                                          | 1   | Iridovirus                     |  | Skin ulcers, scale loss                                                                                                                 |          | Crowding in aquaculture                                                                    | Ulcers and scale loss usually over the posterior half of the body, was found to be caused by a novel iridovirus                                                                                                     |
| de Groof et al     | 2015 | PloS One                                                                                          | https://doi.org/10.1371/journal.pone.0100507 | Lates calcarifer (barramundi)                                          | 1   | Iridovirus                     |  | Skin ulcers, scale loss                                                                                                                 |          | Crowding in aquaculture                                                                    | Ulcers and scale loss usually over the posterior half of the body, was found to be caused by a novel iridovirus                                                                                                     |
| Mahoney et al      | 1973 | Transactions of the American Fisheries Society                                                    | Vol 102, 596-605                             | Bluefish, flounder, weakfish                                           | 22  | Aeromonas, Pseudomonas, Vibrio |  | Skin ulcers, fin rot, blindness                                                                                                         |          | Intense coastal pollution including sewage discharge and industrial waste                  | Many species of wild fish caught in survey trawls in the New York Bight had similar symptoms of fin rot and scale loss with skin ulcers, attributed to massive quantities of bacteria blooming in coastal pollution |
| Hansen et al       | 1990 | Journal of Fish Diseases                                                                          | Vol 13: 93–96                                | Mahi-mahi ( <i>Coryphaena hippurus</i> )                               | 1   | <i>Pantoea agglomerans</i>     |  | Hemorrhagic disease, ulcers of the skin, eyes, and musculature                                                                          |          | Cold water, poor nutrition, crowding in aquaculture                                        | <i>P. agglomerans</i> was isolated from lesions caused by aquaculture crowding and cold water in Mahi-mahi                                                                                                          |
| Wellings et al     | 1977 | Annals of the New York                                                                            | 298(1), 290-304                              | Rock sole ( <i>Lepidopsetta</i> )                                      | 1   | Unknown                        |  | Epidermal papilloma                                                                                                                     |          | Natural incidence reported from trawl surveys                                              | Surveyed wild fish disease prevalence and observed epidermal papilloma (<1%                                                                                                                                         |



Academy  
of Sciences

*bilineata*)

(non-epidemic)

incidence) in rock sole  
(*Lepidopsetta bilineata*),  
lymphocytosis (<2%) in yellowfin  
sole (*Limanda aspera*), and  
pseudobranchial tumors (<8%) in  
cod (*Gadus macrocephalus*)

---

**Supplementary Table S2: List of study sites.** A total of 19 sites were surveyed during the ulcerating skin disease outbreak in January 2018. The site abbreviation code (referenced in Figure 3), geographic position, number of focal species fish transects, total richness and percent of species observed with disease.

| Site              | Code | Easting  | Northing | <i>n</i> | Richness | % spp infected |
|-------------------|------|----------|----------|----------|----------|----------------|
| Baltra*           | BAL  | 803393   | 9954459  | 20       | 63       | 4.8            |
| Camaño Exposed    | CAM  | 802822.7 | 9915869  | 10       | 30       | 16.7           |
| CH (East)*        | CHE  | 750618.3 | 9906145  | 20       | 47       | 21.3           |
| CH (Gemelo East)  | CGE  | 745312   | 9906116  | 11       | 30       | 10.0           |
| CH (Gemelo West)  | CGW  | 743443.4 | 9906369  | 20       | 31       | 22.6           |
| CH (Grande)       | CHG  | 747955.6 | 9904560  | 20       | 21       | 4.8            |
| Champion*         | CHA  | 791020.6 | 9863149  | 20       | 60       | 5.0            |
| Corona del Diablo | CD   | 786811.2 | 9865479  | 5        | 32       | 6.3            |
| Daphne Menor*     | DM   | 794620.1 | 9956334  | 20       | 38       | 5.3            |
| Guy Fawkes*       | GF   | 776904.6 | 9944797  | 20       | 55       | 5.5            |
| Islote Gardner*   | GAR  | 801109.7 | 9852964  | NA       | 38       | 0.0            |
| Islote Tortuga    | IT   | 735928.2 | 9888406  | 10       | 25       | 16.0           |
| La Botella*       | LB   | 778317.8 | 9857288  | NA       | 49       | 0.0            |
| Las Cuevas*       | LC   | 794198.9 | 9860020  | 20       | 57       | 1.8            |
| Las Palmas Chicas | PAL  | 773339.8 | 9924915  | 5        | 23       | 0.0            |
| Pinzón*           | PIN  | 757552.3 | 9934638  | NA       | 45       | 0.0            |
| Roca Cousins*     | RC   | 770133.1 | 9973785  | 20       | 55       | 10.9           |

|               |     |          |         |    |    |      |
|---------------|-----|----------|---------|----|----|------|
| Rocas Beagle* | RB  | 764013.8 | 9954343 | 20 | 54 | 5.6  |
| Rocas Gordon* | GOR | 818291.7 | 9937366 | 10 | 36 | 13.9 |

---

CH: Cuatro Hermanos

\*Sites that have been monitored bi-annually since at least 2002

**Supplementary Table S3: Statistical tests of differences in population size among years for *Holacanthus passer* and *Stegastes beebei* at Cuatro Hermanos East.** We performed ANOVA and multiple comparisons tests on abundance for *H. passer* and *S. beebei* population size over the study period of January 2013 – July 2017 at the site of Cuatro Hermanos East, where the disease outbreak reached its highest prevalence. All data are in MaxN, the maximum number of individuals observed together in a single frame over a 10-minute period of video analyzed. MaxN for *H. passer* is standardized to the depth of view of the water column during the video analyzed (visibility, in meters), and log-transformed to meet assumptions of normality and homogeneity of variance. MaxN for *S. beebei* is standardized to the benthic area visible in the video (m<sup>2</sup>), and is untransformed.

One-way ANOVA

Factor: Date

Response variable: Abundance (MaxN) *Holacanthus passer*

ANOVA table

|           | Df | Sum Sq | Mean Sq | F value | Pr(>F) |
|-----------|----|--------|---------|---------|--------|
| Date      | 11 | 42.441 | 3.8583  | 9.7381  | <.001  |
| Residuals | 81 | 32.093 | 0.3962  |         |        |

Tukey multiple comparison of means

| Pairwise comparison (year) | Mean difference | Lower 95% CI | Upper 95% CI | Adjusted p-value |
|----------------------------|-----------------|--------------|--------------|------------------|
| 2013-08-09-2013-02-19      | -0.043181799    | -1.1023886   | 1.01602499   | 1                |
| 2014-01-10-2013-02-19      | -0.590777696    | -1.6499845   | 0.46842909   | 0.769433         |
| 2014-08-02-2013-02-19      | -0.201530096    | -1.3456042   | 0.94254399   | 0.9999821        |
| 2015-01-08-2013-02-19      | 0.096682282     | -0.9625245   | 1.15588907   | 1                |
| 2015-07-14-2013-02-19      | -0.048476922    | -1.1076837   | 1.01072986   | 1                |
| 2016-01-08-2013-02-19      | -1.311987459    | -2.3711942   | -0.25278067  | 0.0041241        |
| 2016-03-25-2013-02-19      | -1.909683216    | -3.0060664   | -0.81330003  | 0.000006         |

|                       |              |            |             |           |
|-----------------------|--------------|------------|-------------|-----------|
| 2016-08-04-2013-02-19 | -1.462871214 | -2.522078  | -0.40366443 | 0.000747  |
| 2016-11-16-2013-02-19 | 0.023315929  | -1.0358909 | 1.08252271  | 1         |
| 2017-01-12-2013-02-19 | 0.275466928  | -0.7837399 | 1.33467371  | 0.9991924 |
| 2017-07-19-2013-02-19 | -0.635845992 | -1.6950528 | 0.42336079  | 0.6784909 |
| 2014-01-10-2013-08-09 | -0.547595897 | -1.6068027 | 0.51161089  | 0.8441051 |
| 2014-08-02-2013-08-09 | -0.158348298 | -1.3024224 | 0.98572579  | 0.9999985 |
| 2015-01-08-2013-08-09 | 0.139864081  | -0.9193427 | 1.19907087  | 0.9999991 |
| 2015-07-14-2013-08-09 | -0.005295123 | -1.0645019 | 1.05391166  | 1         |
| 2016-01-08-2013-08-09 | -1.26880566  | -2.3280124 | -0.20959888 | 0.0065461 |
| 2016-03-25-2013-08-09 | -1.866501417 | -2.9628846 | -0.77011823 | 0.0000105 |
| 2016-08-04-2013-08-09 | -1.419689416 | -2.4788962 | -0.36048263 | 0.0012351 |
| 2016-11-16-2013-08-09 | 0.066497728  | -0.9927091 | 1.12570451  | 1         |
| 2017-01-12-2013-08-09 | 0.318648726  | -0.7405581 | 1.37785551  | 0.9969959 |
| 2017-07-19-2013-08-09 | -0.592664194 | -1.651871  | 0.46654259  | 0.7658588 |
| 2014-08-02-2014-01-10 | 0.389247599  | -0.7548265 | 1.53332168  | 0.9914705 |
| 2015-01-08-2014-01-10 | 0.687459978  | -0.3717468 | 1.74666676  | 0.5654752 |
| 2015-07-14-2014-01-10 | 0.542300774  | -0.516906  | 1.60150756  | 0.8522284 |
| 2016-01-08-2014-01-10 | -0.721209763 | -1.7804165 | 0.33799702  | 0.4909299 |
| 2016-03-25-2014-01-10 | -1.31890552  | -2.4152887 | -0.22252234 | 0.0061845 |
| 2016-08-04-2014-01-10 | -0.872093519 | -1.9313003 | 0.18711327  | 0.2123894 |
| 2016-11-16-2014-01-10 | 0.614093625  | -0.4451132 | 1.67330041  | 0.723717  |
| 2017-01-12-2014-01-10 | 0.866244623  | -0.1929622 | 1.92545141  | 0.220704  |
| 2017-07-19-2014-01-10 | -0.045068297 | -1.1042751 | 1.01413849  | 1         |
| 2015-01-08-2014-08-02 | 0.298212379  | -0.8458617 | 1.44228646  | 0.9991753 |
| 2015-07-14-2014-08-02 | 0.153053174  | -0.9910209 | 1.29712726  | 0.999999  |
| 2016-01-08-2014-08-02 | -1.110457363 | -2.2545314 | 0.03361672  | 0.0653453 |
| 2016-03-25-2014-08-02 | -1.708153119 | -2.8867296 | -0.52957661 | 0.0003149 |
| 2016-08-04-2014-08-02 | -1.261341118 | -2.4054152 | -0.11726703 | 0.0182745 |
| 2016-11-16-2014-08-02 | 0.224846026  | -0.9192281 | 1.36892011  | 0.999946  |
| 2017-01-12-2014-08-02 | 0.476997024  | -0.6670771 | 1.62107111  | 0.9596456 |
| 2017-07-19-2014-08-02 | -0.434315896 | -1.57839   | 0.70975819  | 0.979705  |
| 2015-07-14-2015-01-08 | -0.145159204 | -1.204366  | 0.91404758  | 0.9999987 |
| 2016-01-08-2015-01-08 | -1.408669741 | -2.4678765 | -0.34946296 | 0.0014018 |
| 2016-03-25-2015-01-08 | -2.006365498 | -3.1027487 | -0.90998231 | 0.0000017 |
| 2016-08-04-2015-01-08 | -1.559553497 | -2.6187603 | -0.50034671 | 0.0002339 |
| 2016-11-16-2015-01-08 | -0.073366353 | -1.1325731 | 0.98584043  | 1         |
| 2017-01-12-2015-01-08 | 0.178784646  | -0.8804221 | 1.23799143  | 0.9999884 |
| 2017-07-19-2015-01-08 | -0.732528275 | -1.7917351 | 0.32667851  | 0.4663747 |
| 2016-01-08-2015-07-14 | -1.263510537 | -2.3227173 | -0.20430375 | 0.0069214 |
| 2016-03-25-2015-07-14 | -1.861206294 | -2.9575895 | -0.76482311 | 0.0000112 |

|                       |              |            |             |           |
|-----------------------|--------------|------------|-------------|-----------|
| 2016-08-04-2015-07-14 | -1.414394293 | -2.4736011 | -0.35518751 | 0.0013127 |
| 2016-11-16-2015-07-14 | 0.071792851  | -0.9874139 | 1.13099964  | 1         |
| 2017-01-12-2015-07-14 | 0.32394385   | -0.7352629 | 1.38315063  | 0.996532  |
| 2017-07-19-2015-07-14 | -0.58736907  | -1.6465759 | 0.47183771  | 0.7758308 |
| 2016-03-25-2016-01-08 | -0.597695757 | -1.6940789 | 0.49868743  | 0.7940263 |
| 2016-08-04-2016-01-08 | -0.150883755 | -1.2100905 | 0.90832303  | 0.999998  |
| 2016-11-16-2016-01-08 | 1.335303388  | 0.2760966  | 2.39451017  | 0.0031965 |
| 2017-01-12-2016-01-08 | 1.587454387  | 0.5282476  | 2.64666117  | 0.0001659 |
| 2017-07-19-2016-01-08 | 0.676141467  | -0.3830653 | 1.73534825  | 0.5906038 |
| 2016-08-04-2016-03-25 | 0.446812001  | -0.6495712 | 1.54319518  | 0.9656857 |
| 2016-11-16-2016-03-25 | 1.932999145  | 0.836616   | 3.02938233  | 0.0000045 |
| 2017-01-12-2016-03-25 | 2.185150143  | 1.088767   | 3.28153333  | 0.0000002 |
| 2017-07-19-2016-03-25 | 1.273837223  | 0.177454   | 2.37022041  | 0.0097375 |
| 2016-11-16-2016-08-04 | 1.486187144  | 0.4269804  | 2.54539393  | 0.000567  |
| 2017-01-12-2016-08-04 | 1.738338142  | 0.6791314  | 2.79754493  | 0.0000245 |
| 2017-07-19-2016-08-04 | 0.827025222  | -0.2321816 | 1.88623201  | 0.2821603 |
| 2017-01-12-2016-11-16 | 0.252150999  | -0.8070558 | 1.31135778  | 0.9996486 |
| 2017-07-19-2016-11-16 | -0.659161922 | -1.7183687 | 0.40004486  | 0.6280729 |
| 2017-07-19-2017-01-12 | -0.91131292  | -1.9705197 | 0.14789386  | 0.1623097 |

### One-way ANOVA

Factor: Date

Response variable: Abundance (MaxN) *Stegastes beebei*

### ANOVA table

|           | Df | Sum Sq | Mean Sq | F-value | Pr(>F) |
|-----------|----|--------|---------|---------|--------|
| Date      | 11 | 1535.4 | 139.578 | 8.396   | <.001  |
| Residuals | 81 | 1346.6 | 16.624  |         |        |

### Tukey multiple comparison of means

| Pairwise comparison (year) | Mean difference | Lower 95% CI | Upper 95% CI | Adjusted p-value |
|----------------------------|-----------------|--------------|--------------|------------------|
| 2013-08-09-2013-02-19      | 1.40277778      | -5.45827223  | 8.26382779   | 0.99992          |
| 2014-01-10-2013-02-19      | -3.65972222     | -10.52077223 | 3.20132779   | 0.8157732        |
| 2014-08-02-2013-02-19      | -4.68055556     | -12.09133656 | 2.73022545   | 0.6064526        |
| 2015-01-08-2013-02-19      | -1.38888889     | -8.2499389   | 5.47216112   | 0.9999275        |
| 2015-07-14-2013-02-19      | 0.95486111      | -5.9061889   | 7.81591112   | 0.9999984        |
| 2016-01-08-2013-02-19      | -5.51388889     | -12.3749389  | 1.34716112   | 0.2430601        |

|                       |              |              |             |           |
|-----------------------|--------------|--------------|-------------|-----------|
| 2016-03-25-2013-02-19 | -9.3452381   | -16.44709957 | -2.24337662 | 0.0016612 |
| 2016-08-04-2013-02-19 | -11.88888889 | -18.7499389  | -5.02783888 | 0.0000068 |
| 2016-11-16-2013-02-19 | 1.31944444   | -5.54160557  | 8.18049446  | 0.9999566 |
| 2017-01-12-2013-02-19 | -5.13888889  | -11.9999389  | 1.72216112  | 0.3425686 |
| 2017-07-19-2013-02-19 | -3.88194444  | -10.74299446 | 2.97910557  | 0.7531164 |
| 2014-01-10-2013-08-09 | -5.0625      | -11.92355001 | 1.79855001  | 0.3652412 |
| 2014-08-02-2013-08-09 | -6.08333333  | -13.49411434 | 1.32744767  | 0.2160807 |
| 2015-01-08-2013-08-09 | -2.79166667  | -9.65271668  | 4.06938334  | 0.9660752 |
| 2015-07-14-2013-08-09 | -0.44791667  | -7.30896668  | 6.41313334  | 1         |
| 2016-01-08-2013-08-09 | -6.91666667  | -13.77771668 | -0.05561666 | 0.0463611 |
| 2016-03-25-2013-08-09 | -10.74801587 | -17.84987734 | -3.6461544  | 0.0001368 |
| 2016-08-04-2013-08-09 | -13.29166667 | -20.15271668 | -6.43061666 | 0.0000004 |
| 2016-11-16-2013-08-09 | -0.08333333  | -6.94438334  | 6.77771668  | 1         |
| 2017-01-12-2013-08-09 | -6.54166667  | -13.40271668 | 0.31938334  | 0.0760509 |
| 2017-07-19-2013-08-09 | -5.28472222  | -12.14577223 | 1.57632779  | 0.3014449 |
| 2014-08-02-2014-01-10 | -1.02083333  | -8.43161434  | 6.38994767  | 0.9999986 |
| 2015-01-08-2014-01-10 | 2.27083333   | -4.59021668  | 9.13188334  | 0.9932087 |
| 2015-07-14-2014-01-10 | 4.61458333   | -2.24646668  | 11.47563334 | 0.5102482 |
| 2016-01-08-2014-01-10 | -1.85416667  | -8.71521668  | 5.00688334  | 0.9988499 |
| 2016-03-25-2014-01-10 | -5.68551587  | -12.78737734 | 1.4163456   | 0.2481176 |
| 2016-08-04-2014-01-10 | -8.22916667  | -15.09021668 | -1.36811666 | 0.0064358 |
| 2016-11-16-2014-01-10 | 4.97916667   | -1.88188334  | 11.84021668 | 0.3907855 |
| 2017-01-12-2014-01-10 | -1.47916667  | -8.34021668  | 5.38188334  | 0.9998652 |
| 2017-07-19-2014-01-10 | -0.22222222  | -7.08327223  | 6.63882779  | 1         |
| 2015-01-08-2014-08-02 | 3.29166667   | -4.11911434  | 10.70244767 | 0.9378213 |
| 2015-07-14-2014-08-02 | 5.63541667   | -1.77536434  | 13.04619767 | 0.3200686 |
| 2016-01-08-2014-08-02 | -0.83333333  | -8.24411434  | 6.57744767  | 0.9999998 |
| 2016-03-25-2014-08-02 | -4.66468254  | -12.29895423 | 2.96958915  | 0.654147  |
| 2016-08-04-2014-08-02 | -7.20833333  | -14.61911434 | 0.20244767  | 0.0641483 |
| 2016-11-16-2014-08-02 | 6            | -1.41078101  | 13.41078101 | 0.2334488 |
| 2017-01-12-2014-08-02 | -0.45833333  | -7.86911434  | 6.95244767  | 1         |
| 2017-07-19-2014-08-02 | 0.79861111   | -6.6121699   | 8.20939212  | 0.9999999 |
| 2015-07-14-2015-01-08 | 2.34375      | -4.51730001  | 9.20480001  | 0.9911846 |
| 2016-01-08-2015-01-08 | -4.125       | -10.98605001 | 2.73605001  | 0.6764271 |
| 2016-03-25-2015-01-08 | -7.95634921  | -15.05821068 | -0.85448774 | 0.0151785 |
| 2016-08-04-2015-01-08 | -10.5        | -17.36105001 | -3.63894999 | 0.0001093 |
| 2016-11-16-2015-01-08 | 2.70833333   | -4.15271668  | 9.56938334  | 0.9727999 |
| 2017-01-12-2015-01-08 | -3.75        | -10.61105001 | 3.11105001  | 0.7913351 |
| 2017-07-19-2015-01-08 | -2.49305556  | -9.35410557  | 4.36799446  | 0.985535  |
| 2016-01-08-2015-07-14 | -6.46875     | -13.32980001 | 0.39230001  | 0.0833919 |

---

|                       |              |              |             |           |
|-----------------------|--------------|--------------|-------------|-----------|
| 2016-03-25-2015-07-14 | -10.30009921 | -17.40196068 | -3.19823774 | 0.0003109 |
| 2016-08-04-2015-07-14 | -12.84375    | -19.70480001 | -5.98269999 | 0.0000009 |
| 2016-11-16-2015-07-14 | 0.36458333   | -6.49646668  | 7.22563334  | 1         |
| 2017-01-12-2015-07-14 | -6.09375     | -12.95480001 | 0.76730001  | 0.1309792 |
| 2017-07-19-2015-07-14 | -4.83680556  | -11.69785557 | 2.02424446  | 0.4361496 |
| 2016-03-25-2016-01-08 | -3.83134921  | -10.93321068 | 3.27051226  | 0.8046654 |
| 2016-08-04-2016-01-08 | -6.375       | -13.23605001 | 0.48605001  | 0.0936896 |
| 2016-11-16-2016-01-08 | 6.83333333   | -0.02771668  | 13.69438334 | 0.0519045 |
| 2017-01-12-2016-01-08 | 0.375        | -6.48605001  | 7.23605001  | 1         |
| 2017-07-19-2016-01-08 | 1.63194444   | -5.22910557  | 8.49299446  | 0.9996514 |
| 2016-08-04-2016-03-25 | -2.54365079  | -9.64551226  | 4.55821068  | 0.9870901 |
| 2016-11-16-2016-03-25 | 10.66468254  | 3.56282107   | 17.76654401 | 0.0001596 |
| 2017-01-12-2016-03-25 | 4.20634921   | -2.89551226  | 11.30821068 | 0.6963935 |
| 2017-07-19-2016-03-25 | 5.46329365   | -1.63856782  | 12.56515512 | 0.3032633 |
| 2016-11-16-2016-08-04 | 13.20833333  | 6.34728332   | 20.06938334 | 0.0000004 |
| 2017-01-12-2016-08-04 | 6.75         | -0.11105001  | 13.61105001 | 0.0580142 |
| 2017-07-19-2016-08-04 | 8.00694444   | 1.14589443   | 14.86799446 | 0.0092053 |
| 2017-01-12-2016-11-16 | -6.45833333  | -13.31938334 | 0.40271668  | 0.0844874 |
| 2017-07-19-2016-11-16 | -5.20138889  | -12.0624389  | 1.65966112  | 0.3245851 |
| 2017-07-19-2017-01-12 | 1.25694444   | -5.60410557  | 8.11799446  | 0.9999733 |

---



**Supplementary Table S4: Statistical test of density dependence of disease prevalence using arcsin-square root-transformed data.** We tested for improved fit of data to a linear model after arcsin-square root-transforming prevalence values as predicted by population density for each of the four primary species of fish affected by ulcerative skin disease. No change in model fit was observed in model outputs for any of the four species.

***Holacanthus passer***

|                          | Estimate         | Std. Error | t-value | p-value |
|--------------------------|------------------|------------|---------|---------|
| (Intercept)              | 0.0058           | 0.0047     | 1.2310  | 0.2419  |
| mean_abund               | 0.0017           | 0.0008     | 2.1170  | 0.0558  |
| Residual standard error: | 0.01251 on 12 DF |            |         |         |
| Adjusted r-squared:      | 0.2113           |            |         |         |
| F-statistic:             | 4.482            |            |         |         |

***Stegastes beebei***

|                          | Estimate         | Std. Error | t-value | p-value |
|--------------------------|------------------|------------|---------|---------|
| (Intercept)              | -0.0024          | 0.0058     | -0.4090 | 0.6886  |
| mean_abund               | 0.0013           | 0.0003     | 4.7050  | 0.0003  |
| Residual standard error: | 0.01396 on 15 DF |            |         |         |
| Adjusted r-squared:      | 0.5691           |            |         |         |
| F-statistic:             | 22.13            |            |         |         |

***Myripristis leiognathus***

|                          | Estimate         | Std. Error | t-value | p-value |
|--------------------------|------------------|------------|---------|---------|
| (Intercept)              | 0.0048           | 0.0055     | 0.8620  | 0.4057  |
| mean_abund               | 0.0036           | 0.0012     | 2.9620  | 0.0119  |
| Residual standard error: | 0.01509 on 12 DF |            |         |         |
| Adjusted r-squared:      | 0.3742           |            |         |         |

F-statistic: 8.774

***Microspathodon dorsalis***

|             | Estimate | Std. Error | t-value | p-value |
|-------------|----------|------------|---------|---------|
| (Intercept) | 0.0120   | 0.0122     | 0.9860  | 0.3620  |
| mean_abund  | 0.0014   | 0.0023     | 0.6140  | 0.5620  |

Residual standard error: 0.02791 on 6 DF

Adjusted r-squared: -0.09765

F-statistic: 0.3773

**Supplementary Video S1: Video compilation of disease signs in *H. passer*, *M. leiognathus*, and *S. beebei* at Cuatro Hermanos East.**

**Supplementary Video S2: Video of abnormal behavior expressed by *M leiognathus* with signs of ulcerative skin disease soliciting cleaning by the cleaner fish *Johnrandallia nigrirostris*.**

**Supplementary Text S1: All R custom code used for data analysis and figure creation.** Note: for initial submission only; final code file will be included with data in Dryad repository upon acceptance.
